# Supplementary material
Source: publisher figshare collection journal article supplement (https://wiley.figshare.com/articles/dataset/_/3528569)

**Volker H. W. Rudolf. 2007. Consequences of stage-structured predators: cannibalism, behavioral effects, and trophic cascades. *Ecology* 88:2991-3003.**

Appendix E. Effect of behavior-mediated avoidance of cannibals on the stability of the predator-prey system without handling time.

Effect of the strength of the negative behavioral effect of adult predators on the attack rate of juvenile predators,  $\gamma$ , on the stability region of the predator-prey system without handling time (i.e.  $T_h = 0$ ). The handling time does not alter the general effect of  $\gamma$ , but it strongly decreases the stability region of the system in general (compare to figure 3B). All other parameters are equal to Fig. 3B.

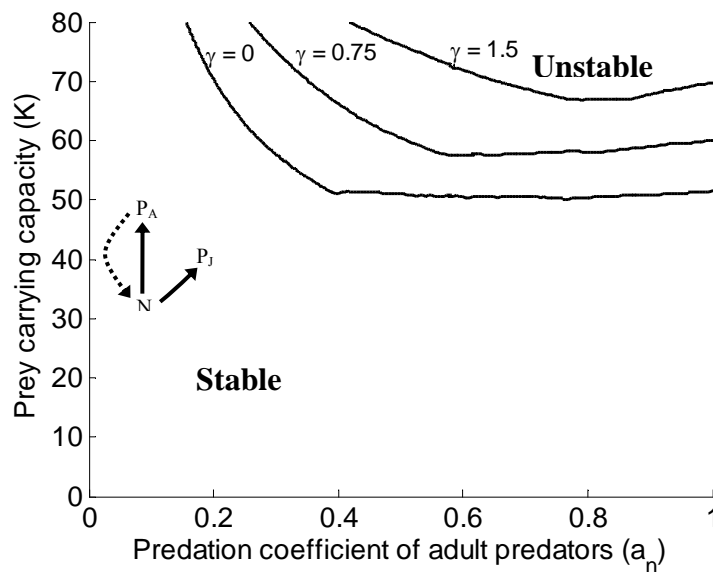

Supplement: Supplementary file 1 [file 1]
