# Supplementary material
Source: publisher figshare collection journal article supplement (https://wiley.figshare.com/articles/dataset/_/3528569)
Supplement: Supplementary file 2 [file 1 › appendix-E.htm]

Ecological Archives E088-186-A5


### *Ecological Archives* E088-186-A5

### **Volker H. W. Rudolf. 2007. Consequences of stage-structured predators: cannibalism, behavioral effects, and trophic cascades. *Ecology* 88:2991–3003.**

Appendix E. Effect of behavior-mediated avoidance of cannibals on the stability of the predator–prey system without handling time. Click here for a pdf file of appendix.

---

  

[Back to E088-186]
